# Supplementary material for: Pep-1&amp;Borneol-Bifunctionalized Carmustin-Loaded Micelles Enhance Anti-Glioma Efficacy through Tumor Targeting and BBB Penetrating
Source: Preprints.org preprint supplement (doi:10.20944/preprints201810.0574.v1), 2018-10-24
Supplement: Supplementary file 2 [file supplementary]

**Supplementary Information**

**Pep-1&Borneol-bifunctionalized carmustin-loaded micelles enhance anti-glioma efficacy through tumor targeting and BBB penetrating**

Xiaoyuan Guo1, Guojian Wu1, Yue Qin2, Hong Wang1, Ding Qu2,*, Lukui Chen1,*

1 Department of Neurosurgery, School of Medicine, Zhongda Hospital, Southeast University, Nanjing 210009, China

2 Affiliated Hospital of Integrated Traditional Chinese and Western Medicine, Nanjing University of Chinese Medicine, Nanjing 210028, China

*Correspondence: [chenluk@126.com](mailto:chenluk@126.com) (L.C.); [qddll2@163.com](mailto:qddll2@163.com) (D.Q.)


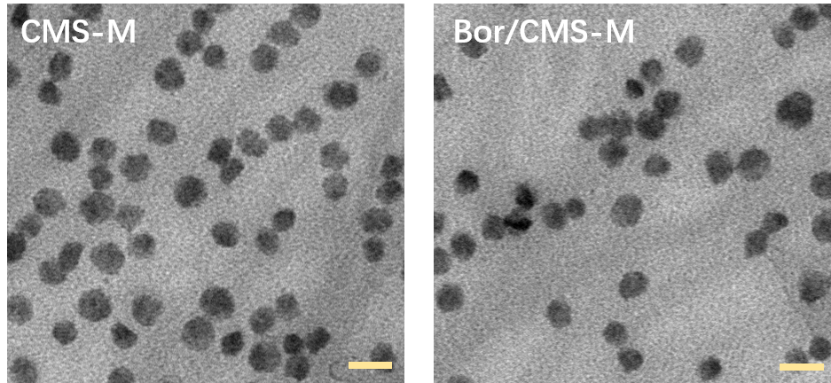


Figure S1. TEM images of CMS-M and Bor/CMS-M in pH 7.4.


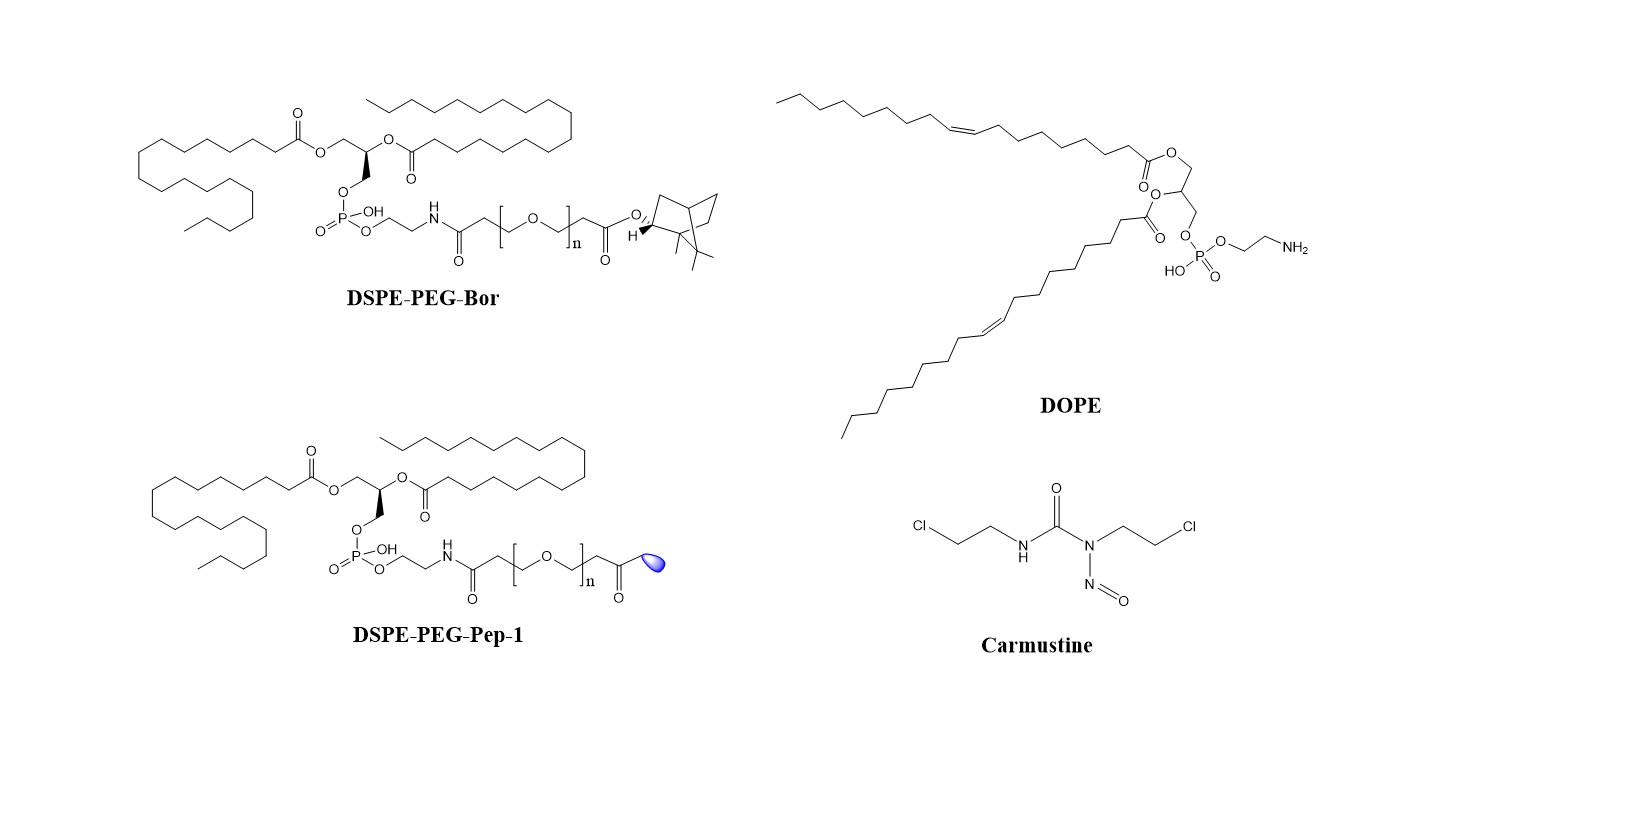


Figure S2. Chemical structure of various lipids and drug used in Pep-1/Bor/CMS-M.
